# Supplementary material
Source: PubMed Central journal article supplement (PMC11386742)
Supplement: PBI-17-2096-s005.pdf [file PBI-17-2096-s005.pdf]

|           |                                                                                   |     |
|-----------|-----------------------------------------------------------------------------------|-----|
| <i>Rc</i> | CTACTGAAGATCAAGTGGCATCACCTGAAAATACCCATTACCCAAAAACACTCATGACAATCCTACATTACAACACGCTG  | 80  |
| X134      | CTACTGAAGATCAAGTGGCATCACCTGAAAATACCCATTACCCAAAAACACTCATGACAATCCTACATTACAACACGCTG  | 80  |
| S143      | CTACTGAAGATCAAGTGGCATCACCTGAAAATACCCATTACCCAAAAACACTCATGACAATCCTACATTACAACACGCTG  | 80  |
| ZNS       | CTACTGAAGATCAAGTGGCATCACCTGAAAATACCCATTACCCAAAAACACTCATGACAATCCTACATTACAACACGCTG  | 80  |
| <i>Rc</i> | CGACAGCAAGAGATGAACATCAAGAACTACTTGCCAGTTTCAGAGAAATCATCATTTCTCCAGATGGACTACTCCTGAAGG | 160 |
| X134      | CGACAGCAAGAGATGAACATCAAGAACTACTTGCCAGTTTCAGAGAAATCATCATTTCTCCAGATGGACTACTCCTGAAGG | 160 |
| S143      | CGACAGCAAGAGATGAACATCAAGAACTACTTGCCAGTTTCAGAGAAATCATCATTTCTCCAGATGGACTACTCCTGAAGG | 160 |
| ZNS       | CGACAGCAAGAGATGAACATCAAGAACTACTTGCCAGTTTCAGAGAAATCATCATTTCTCCAGATGGACTACTCCTGAAGG | 160 |
| <i>Rc</i> | AAGTGATGACAACAAGACCATGATCAGTCCAGGCACCACACAGAGAATGCTCAAGAGCATCCTGATGATTGTTCCAGTA   | 240 |
| X134      | AAGTGATGACAACAAGACCATGATCAGTCCAGGCACCACACAGAGAATGCTCAAGAGCATCCTGATGATTGTTCCAGTA   | 240 |
| S143      | AAGTGATGACAACAAGACCATGATCAGTCCAGGCACCACACAGAGAATGCTCAAGAGCATCCTGATGATTGTTCCAGTA   | 240 |
| ZNS       | AAGTGATGACAACAAGACCATGATCAGTCCAGGCACCACACAGAGAATGCTCAAGAGCATCCTGATGATTGTTCCAGTA   | 240 |
| <i>Rc</i> | GTCACTGCAGTTACAGGGGAGCAGAAACACCTGAATCAAGGGGCGGAAAGGCGCAAGTGGAAACGCGAAAAGTCGGTGCC  | 320 |
| X134      | GTCACTGCAGTTACAGGGGAGCAGAAACACCTGAATCAAGGGGCGGAAAGGCGCAAGTGGAA-----TGCC           | 306 |
| S143      | GTCACTGCAGTTACAGGGGAGCAGAAACACCTGAATCAAGGGGCGGAAAGGCGCAAGTGGAA-----TGCC           | 306 |
| ZNS       | GTCACTGCAGTTACAGGGGAGCAGAAACACCTGAATCAAGGGGCGGAAAGGCGCAAGTGGAA-----TGCC           | 306 |
| <i>Rc</i> | ATCCAAGGTGATTTTCAGTGCACCATGTGCTGAAAGAGAGGAGAAGAAGAGAGAAGCTCAATGAGAAGTTCATAATTCT   | 400 |
| X134      | ATCCAAGGTGATTTTCAGTGCACCATGTGCTGAAAGAGAGGAGAAGAAGAGAGAAGCTCAATGAGAAGTTCATAATTCT   | 386 |
| S143      | ATCCAAGGTGATTTTCAGTGCACCATGTGCTGAAAGAGAGGAGAAGAAGAGAGAAGCTCAATGAGAAGTTCATAATTCT   | 386 |
| ZNS       | ATCCAAGGTGATTTTCAGTGCACCATGTGCTGAAAGAGAGGAGAAGAAGAGAGAAGCTCAATGAGAAGTTCATAATTCT   | 386 |
| <i>Rc</i> | GCGATCTTTGGTACCTTTTCATGACAAAAG                                                    | 428 |
| X134      | GCGATCTTTGGTACCTTTTCATGACAAAAG                                                    | 414 |
| S143      | GCGATCTTTGGTACCTTTTCATGACAAAAG                                                    | 414 |
| ZNS       | GCGATCTTTGGTACCTTTTCATGACAAAAG                                                    | 414 |

**Supplemental Figure 1. Multiple alignment of the seventh exon of the *Rc/rc* allele in wild red rice (*Oryza rufipogon*), and three white pericarp rice varieties X134, S143, and ZNS.**
